# Supplementary material for: Agonistic and Antagonistic Roles for TNIK and MINK in Non-Canonical and Canonical Wnt Signalling
Source: PubMed Central journal article supplement (PMC3439448; doi:10.1371/journal.pone.0043330), 2012-09-11
Supplement: pone.0043330.s001.pdf [file pone.0043330.s001.pdf]

A)

|             |      | 10         | 20         | 30         | 40          | 50         | 60         | 70         | 80         | 90         | 100         |
|-------------|------|------------|------------|------------|-------------|------------|------------|------------|------------|------------|-------------|
| hTNIK       | 1    | MASDSPARSL | DEIDLSALRD | PAGIFELVEL | VGNNGTYGQVY | KGRHVKTGQL | AAIKVMDVTG | DEEEIKQEI  | NMLKKYSHHR | NIATYYGAFI | KKNPPGMDDQ  |
| xTNIK-full  | 1    | MASDSPARSL | DEIDLSALRD | PAGIFELVEL | VGNNGTYGQVY | KGRHVKTGQL | AAIKVMDVTG | DEEEIKQEI  | NMLKKYSHHR | NIATYYGAFI | KKNPPGMDDQ  |
| xTNIK-Satow | 1    | MASDSPARSL | DEIDLSALRD | PAGIFELVEL | VGNNGTYGQVY | KGRHVKTGQL | AAIKVMDVTG | DEEEIKQEI  | NMLKKYSHHR | NIATYYGAFI | KKNPPGMDDQ  |
| hTNIK       | 101  | LWLVMFCGA  | GSVTDLIKNT | KGNTLKEEVI | AYICREILRG  | LSHLHQHKVI | HRDIKQGNVL | LTENAEVKLV | DFGVSAQLDR | TVGRRNTFIG | TPYWMAPEVI  |
| xTNIK-full  | 101  | LWLVMFCGA  | GSVTDLIKNT | KGNTLKEEVI | AYICREILRG  | LSHLHQHKVI | HRDIKQGNVL | LTENAEVKLV | DFGVSAQLDR | TVGRRNTFIG | TPYWMAPEVI  |
| xTNIK-Satow | 101  | LWLVMFCGA  | GSVTDLIKNT | KGNTLKEEVI | AYICREILRG  | LSHLHQHKVI | HRDIKQGNVL | LTENAEVKLV | DFGVSAQLDR | TVGRRNTFIG | TPYWMAPEVI  |
| hTNIK       | 201  | ACDENPDATY | DFKSDLWSLG | ITAIEMAEGA | PPLCDMHPMR  | ALFLIPRNP  | PRLSKKWSK  | KFQSFIESCL | VKNHSQRPAT | EQLMKHPFIR | DQPNERQVRI  |
| xTNIK-full  | 201  | ACDENPDATY | DFKSDLWSLG | ITAIEMAEGA | PPLCDMHPMR  | ALFLIPRNP  | PRLSKKWSK  | KFQSFIESCL | VKNHGQRST  | EQLMKHPFIR | DQPNERQVRI  |
| xTNIK-Satow | 201  | ACDENPDATY | DFKSDLWSLG | ITAIEMAEGA | PPLCDMHPMR  | ALFLIPRNP  | PRLSKKWSK  | KFQSFIDSL  | VKNHSQRPTT | DQLMKHPFIR | DQPNERQVRI  |
| hTNIK       | 301  | QLKDHDRTK  | KKRGEKDETE | YEYSGSEEEE | EENDSGEPSS  | ILNLPGESTL | RRDFLRLQLA | NKERSEALRR | QQLEQQQREN | EEHKRQLLAE | RQKRIFEEQKE |
| xTNIK-full  | 301  | QLKDHDRTK  | KKRGEKDETE | YEYSGSEEEE | EENDSGEPSS  | ILNLPGESTL | RRDFLRLQLA | NKERSEALRR | QQLEQQQREN | EEHKRQLLAE | RQKRIFEEQKE |
| xTNIK-Satow | 301  | QLKDHDRTK  | KKRGEKDETE | YEYSGSEEEE | EENDSGEPSS  | ILNLPGESTL | RRDFLRLQLA | NKERSEALRR | QQLEQQQREN | EEHKRQLLAE | RQKRIFEEQKE |
| hTNIK       | 401  | QRRRLEEQR  | REKELRKQEQ | REQRHYEEQ  | MRREEERRA   | EHEQEYIRRO | LEEEQRQLEI | LQQQLLHEQA | LLLEYKRKQL | EEQRAERLQ  | RQLQKERDYL  |
| xTNIK-full  | 401  | QRRRLEEQR  | REKELRKQEQ | REQRHYEEQ  | MRREEERRA   | EHEQEYIRRO | LEEEQRQLEI | LQQQLLHEQA | LLLEYKRKQL | EEQRAERLQ  | RQLQKERDYL  |
| xTNIK-Satow | 401  | QRRRLEEQR  | REKELRKQEQ | REQRHYEEQ  | MRREEERRA   | EHEQEYIRRO | LEEEQRQLEI | LEEEQRQLEI | LLLEYKRKQL | EEQRAERLQ  | RQLQKERDYL  |
| hTNIK       | 501  | VSLQ---QR  | QEQRPVEKK  | PLYHYKEGMS | PSEKPAWAKE  | VEDRSRLNRQ | SSPAMPKHVA | NRISDPNLP  | RSEFSFISGV | QPARTPPMLR | PVDQ--IPLH  |
| xTNIK-full  | 501  | VSLQ---QR  | QEQRPVEKK  | PLYHYKEGMS | PSEKPAWAKE  | VEDRSRLNRQ | SSPAMPKHVA | NRISDPNLP  | RSEFSFISGV | QPARTPPMLR | PVDQ--IPLH  |
| xTNIK-Satow | 472  | VSLQ---QR  | QEQRPVEKK  | PLYHYKEGMS | PSEKPAWAKE  | VEDRSRLNRQ | SSPAMPKHVA | NRISDPNLP  | RSEFSFISGV | QPARTPPMLR | PVDQ--IPLH  |
| hTNIK       | 596  | VAVKSQGPAL | TASQSVHEQP | TKGLSGFQEA | LNVTSHRVM   | PRQNSDPTSE | NPPLPTRIEK | FDRSSWLRQE | EDIPPKVPQR | TTSISPALAR | KNSPGNGSAL  |
| xTNIK-full  | 601  | VSVKTQGSLL | SASQSLHEQS | AKGMSAFQEG | IIS--HRPEM  | PRQNSDPTSE | NPPLPTRIEK | FDRSSWLRQE | EDFPKVPQR  | TTSISPALAR | KNSCGNGNSL  |
| hTNIK       | 696  | GPRLSQPIR  | ASNPDLRRE  | PILESPLQRT | SSGSSSSST   | PSSQSSQGG  | SQPQSGAGSS | ERTRVRA-NS | KSEGSPLVPH | EPAKVKEEES | RDITRPSRPA  |
| xTNIK-full  | 699  | GNNLATHPIR | ASNPDLRRE  | TVIENPIQRI | SSGSSSSST   | PSSQSSQGG  | SQPQSGAGSS | ERNRARAGNN | KPEGSPLLPH | ETSNSKAEEN | RDVTRPSRPA  |
| hTNIK       | 795  | SYKKAIDE-- | -----      | -----      | --DLTALAKE  | LRELRIEETN | RPMKKTVDYS | SSSEESSE   | EEEEEGESET | HDGTVAVSDI | PRLIPTGAPG  |
| xTNIK-full  | 799  | SYKKAIDEAV | ISQTEPADDG | MVMPRRVSKS | KDTLALAKE   | LRELRIEETN | RPIKKTVDYS | SSSEESSE   | EE--DGESEA | QDGTVPVSDI | PRLITITG--  |
| hTNIK       | 871  | S-NEQYVNM  | VGTHGLETS  | ADSFSGSIR  | EGTLMIRETS  | GDKKRSRSHD | SNGFASHINL | PDLVQSSHSP | AGTPTEGLGR | VSTHSQEMDS | GTEYGMGSST  |
| xTNIK-full  | 895  | SENEPYNVGM | QGMETSQSET | FRN----ISR | LDMIR--TS   | GDKKRSRSHD | SNGFASHINL | PDLVQSSHSP | AGTPTEGLGR | GPTHAQEMDT | VNEYGMANNT  |
| hTNIK       | 970  | KASFTPFVDP | RVYQTSPTDE | D-EEDEE--- | ---SSAAALF  | TSELLRQEQ  | KLNEARKISV | VNVNPTNIRP | HSDTPEIRKY | KKRFNSEILC | AALWGVNLLV  |
| xTNIK-full  | 988  | KASFTPFVDP | RVYQTSPTDN | DDEEDED    | DEESSATALF  | TSELLRQEQ  | KLNEARKISV | VNVNPTNIRP | HSDTPEIRKY | KKRFNSEILC | AALWGVNLLV  |
| hTNIK       | 1063 | GTENGLMLLD | RSQGQKVYNL | INRRRFQMD  | VLEGLNVLT   | ISGKKNLKV  | YLSWLNRI   | LHNDPEVEKK | QGWITVGDLE | GCIHYKVVKY | ERIKFLVIAL  |
| xTNIK-full  | 1088 | GTENGLMLLD | RSQGQKVYNL | INRRRFQME  | VLEGLNVLT   | ISGKKNLKV  | YLSWLNRI   | LHNDPEVEKK | QGWITVGELE | GCVHYKVVKY | ERIKFLVIAL  |
| hTNIK       | 1163 | KNAVEIYAWA | PKPYHKFMAF | KSFADLQHKP | LLVDLTVVEEG | QLRKVIFGSH | TGFHVIDVDS | GNSYDIYIPS | HIQGNITPHA | IVILPKTDGM | EMLVCYEDEG  |
| xTNIK-full  | 1188 | KNAVEIYAWA | PKPYHKFMAF | KSFTDLQHRP | LLCDLTVVEEG | QLRKVIFGSS | TGFHVIDVDS | GNTYDIYIPS | HIQGNITPHA | IVLPLKTDGM | EMLVCYEDEG  |
| hTNIK       | 1263 | VYVNTYGRIT | KDVLVQWGM  | PTSVAIYHSN | QIMGWGEKAI  | EIRSVETGHL | DGVFMHKRAQ | RLKFLCERN  | KVFFASVRS  | GSSQVFFMTL | NRNSMMNW    |
| xTNIK-full  | 1288 | VYVNTYGRIT | KDVLVQWGM  | PTSVAIYHSN | QIMGWGEKAI  | EIRSVETGHL | DGVFMHKRAQ | RLKFLCERN  | KVFFASVRS  | GSSQVFFMTL | NRNSMMNW    |

B)

|       |      | 10         | 20         | 30         | 40          | 50         | 60         | 70         | 80         | 90         | 100        |
|-------|------|------------|------------|------------|-------------|------------|------------|------------|------------|------------|------------|
| hMINK | 1    | MGDPAPARSL | DDIDLSALRD | PAGIFELVEV | VGNNGTYGQVY | KGRHVKTGQL | AAIKVMDVTE | DEEEIKQEI  | NMLKKYSHHR | NIATYYGAFI | KKSPPGDDQ  |
| xMINK | 1    | MASDPPARSL | DDIDLSALRD | PAGIFELVEV | VGNNGTYGQVY | KGRHVKTGQL | AAIKVMDVTE | DEEEIKQEI  | NMLKKYSHHR | NIATYYGAFI | KKSPPGDDQ  |
| hMINK | 101  | LWLVMFCGA  | GSVTDLVKNT | KGNAKEDCI  | AYICREILRG  | LHLHAHKVI  | HRDIKQGNVL | LTENAEVKLV | DFGVSAQLDR | TVGRRNTFIG | TPYWMAPEVI |
| xMINK | 101  | LWLVMFCGA  | GSVTDLVKNT | KGNAKEDCI  | AYICREILRG  | LHLHAHKVI  | HRDIKQGNVL | LTENAEVKLV | DFGVSAQLDR | TVGRRNTFIG | TPYWMAPEVI |
| hMINK | 201  | ACDENPDATY | DYRSDIWSLG | ITAIEMAEGA | PPLCDMHPMR  | ALFLIPRNP  | PRLSKKWSK  | KFIDFIDTCL | IKTYLSRPT  | EQLKHPFIR  | DQPTERQVRI |
| xMINK | 201  | ACDENPDATY | DYRSDIWSLG | ITAIEMAEGA | PPLCDMHPMR  | ALFLIPRNP  | PRLSKKWSK  | KFIDFIDTCL | IKNYMSRPT  | EPLKHPFIR  | DQPTERQVRI |
| hMINK | 301  | QLKDHDISR  | KKRGEKEETE | YEYSGSEED  | DSHGEEGEP   | SIMNVPGEST | LRREFLRLQ  | ENKSNSEALK | QQQLQQQQ   | RDPEAHIKHL | LHQRRRIE   |
| xMINK | 301  | QLKDHDISR  | KKRGEKEETE | YEYSGSEED  | ENHGDEGEP   | SIMNVPGEST | LRREFLRLQ  | ENKSNSEALK | QQ--VGAQH  | RDSEAHIKOL | LHERQRIE   |
| hMINK | 401  | QKEERRVVEE | QRREREQRK  | LQEKEQRRR  | EDMQALRRE   | ERRQAEREQ  | YKRKQLEEQ  | QSERLQRLQ  | QEHAYLKSQ  | QQQQQQQLQ  | QQQQLLPGD  |
| xMINK | 399  | QKEERRVVEE | QRREREQRK  | QKEEQRRR   | DDI---RRE   | ERRMAEREQ  | YKRKQLEEQ  | QSERLQRLQ  | QEHAYLKSQ  | QQQQQQQQQ  | QQQK----   |
| hMINK | 501  | RKPLYHYGRG | -MNPADKPAW | AREVEERTM  | NKQNSPLAK   | SKPGSTGPEP | PIPQASPGPP | GPLSQTPPMQ | RPVEPQEGPH | KSLVAHRVPL | KPYAA--PVP |
| xMINK | 491  | -KPLYHYNRG | VMNPSEKPAW | AREVEERSL  | NKQS--SPLAI | TKLSSVESAG | NP-----    | ---SQTTPSQ | RPPEIQE--H | KPLRTTPQNR | ---AAFRPTP |
| hMINK | 598  | RSQSLQDQPT | RNLAAFPASH | DDPAIPAPT  | ATPSARGAVI  | RQNSDPTSEG | PGPSPNPAP  | VRPDNEA-PP | KVPQRTSSIA | TALNTSGAGG | SRPAQA---V |
| xMINK | 573  | RPNSLQDPLA | PPVRHAPVPP | PADRNHLRSQ | SSDPSPDGG   | PSSRLERGP- | -----W     | VKLQPEVHPP | KVPQRTSSIA | TALNTSGSGG | SRPVQQQP   |
| hMINK | 694  | RARPRSNSAW | QIYLQRAER  | GTPKPPGPPA | QPPGPPNASS  | NPDLRSDPG  | WERSDVSPLA | SHGLPQAGS  | LERNRVGVS  | KPDSSPVLSP | GNAKAPDDHR |
| xMINK | 663  | RA-----    | -----      | -----S     | NPDLRRAESG  | WERSDLSQS  | PHPNLPQAGS | LERNRI-APH | KLEESSISPP | GSKTPGEEHR |            |
| hMINK | 794  | SRPGRPASYS | RAIGEDFVLL | KERTLDEAPR | PKKAMDYSS   | SSEEVESSED | DEEEGEGPA  | EGSRDTPGG- | RS--DGD    | VSTMVHVHVE | EITG-T-QPP |
| xMINK | 725  | SRPGRPA--- | -----DHLLV | KDRP-EDVPK | APKKALDYSS  | SSDELDSSE  | EEEEGDAERQ | EPSRDSGAS  | RSGRDADTDS | VSTMVHVHVE | ELMGSTSDS  |
| hMINK | 889  | YGGGTMVVQR | TPEEERLLH  | ADSNYTNLP  | DVVQPSHPT   | ENSKGQSPSS | KDGS--DYQS | RGLVKAPGKS | SFTMFVDLGI | YQP--GGSDS | IPITA-LVGG |
| xMINK | 816  | YGDGTMVQQR | TPEEERLLH  | ADSNYTNLP  | DVVQPSHPT   | EPKQGTSPSS | KEGNSDYQS  | RGLVKAPKPT | SFTMFVDLGL | YQS5GGGDDT | IPVAASYVSG |
| hMINK | 986  | EGTRLDQLQY | DVRKGSVNVN | NPTNTRAHSE | TPEIRKYKRR  | FNSEILCAAL | WGVNLLVGT  | NGLMLLDRSG | QGVYGLIGR  | RRFQQMDVLE | GLNLLITISG |
| xMINK | 916  | DPARLEQLKY | EARKGSVNVN | NPTNTRPHSD | TPEIRKYKRR  | FNSEILCAAL | WGVNLLVGT  | NGLMLLDRSG | QGVYGLITR  | RRFQQMDVLE | GLNLLITISG |
| hMINK | 1086 | KRNKLRVYLL | SWLRNKILHN | DPEVEKQGW  | TTVGDMEGCG  | HYRVVKYERI | KFLVIALKSS | VEVYAWAPK  | YHKFMAFKSF | ADLPHRPLLV | DLTVEEGQRL |
| xMINK | 1016 | KRNKLRVYLL | SWLRNKILHN | DPEVEKQGW  | STVGDMDGCV  | HYRVVKYERI | KFLVIALKNS | VEVYAWAPK  | YHKFMAFKSF | TDIHPRLQLV | DLTVEEGQRL |
| hMINK | 1186 | KVIYGSAGF  | HAVDVDSGNS | YDIYIPVHIQ | SQITPHAIIF  | LPNTDGMEML | LCYEDGYYV  | NTYGRIKDV  | VLQWGMEMTS | VAYICSNQIM | GWGEKAIER  |
| xMINK | 1116 | KVIYGSAGF  | HAVDVDSGNN | YDIYIPVHIQ | SQINPHAIIF  | LPNTDGMEML | LCYEDGYYV  | NTYGRIKDV  | VLQWGMEMTS | VAYICSNQIM | GWGEKAIER  |
| hMINK | 1286 | SVETGHLDGV | FHMKRAQRLK | FLCERNDKVF | FASVRSGGSS  | QYVFMFLNRS | CIMNW      |            |            |            |            |
| xMINK | 1216 | SVETGHLDGV | FHMKRAQRLK | FLCERNDKVF | FASVRSGGSS  | QYVFMFLNRS | CIMNW      |            |            |            |            |

Figure S1i

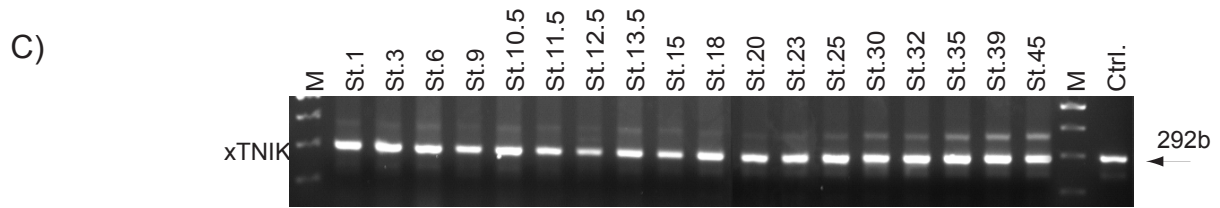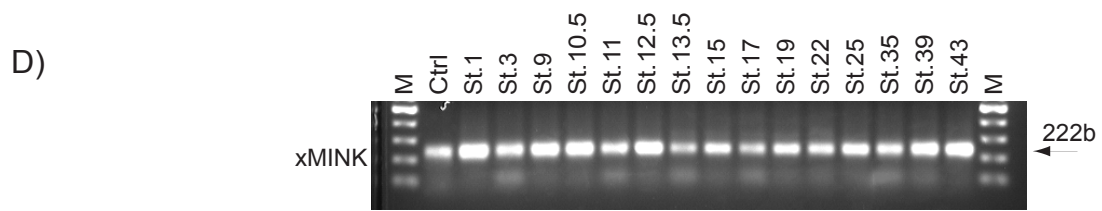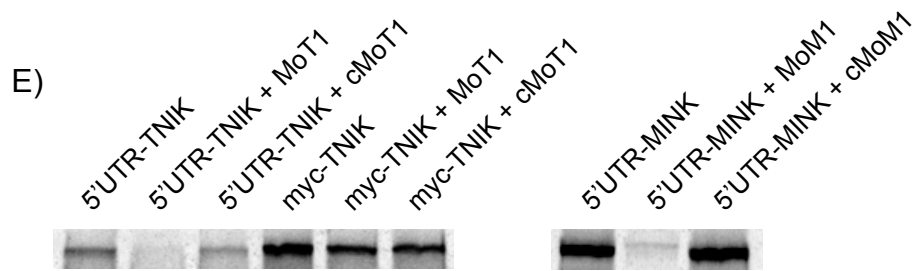

Figure S1ii

F)

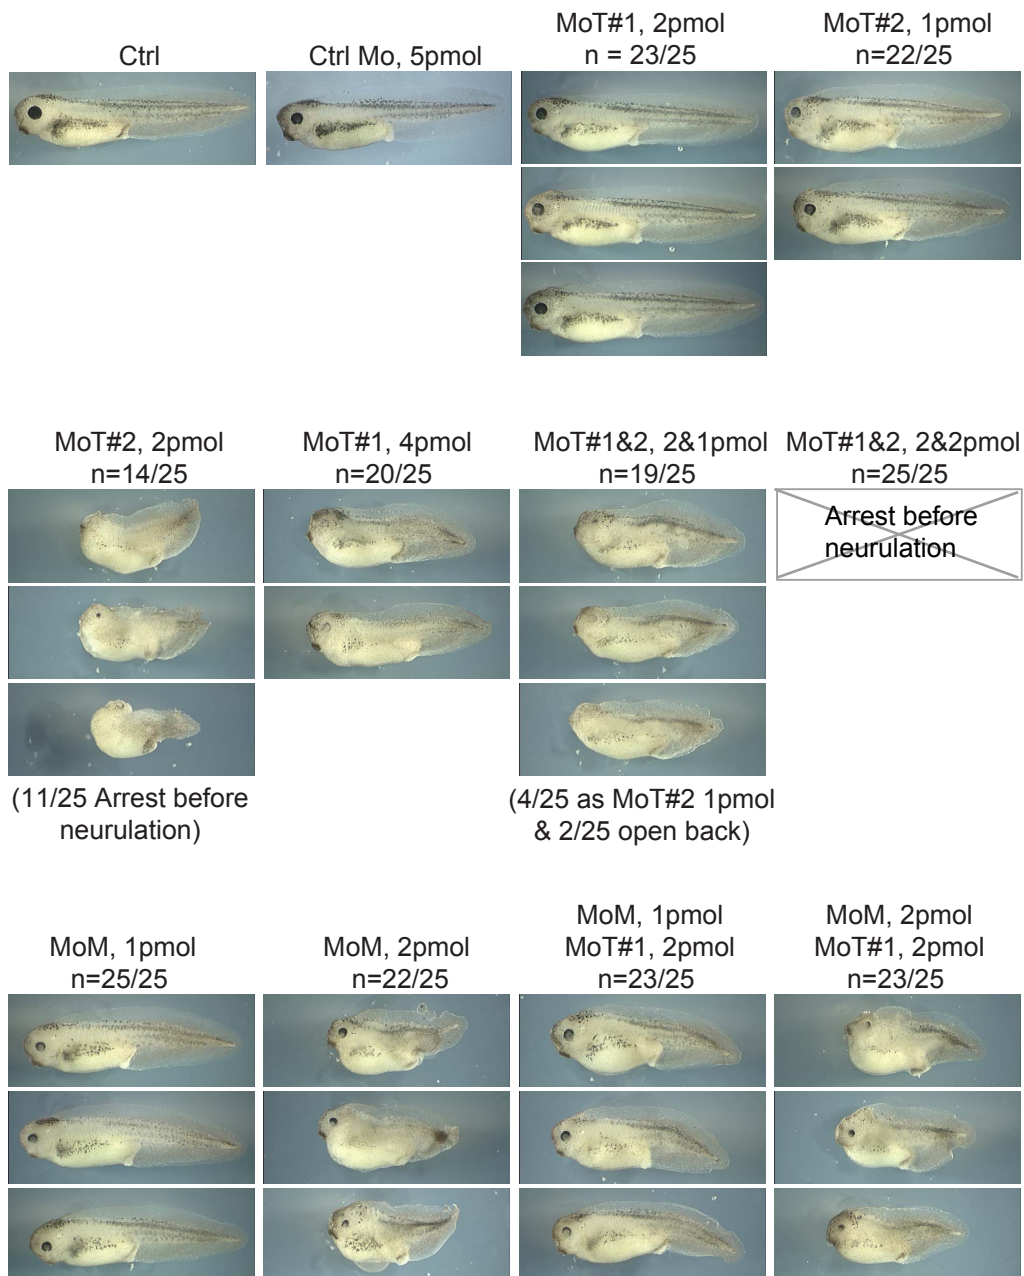

Figure S1iii
