# Supplementary material for: Agonistic and Antagonistic Roles for TNIK and MINK in Non-Canonical and Canonical Wnt Signalling
Source: PubMed Central journal article supplement (PMC3439448; doi:10.1371/journal.pone.0043330), 2012-09-11
Supplement: pone.0043330.s002.pdf [file pone.0043330.s002.pdf]

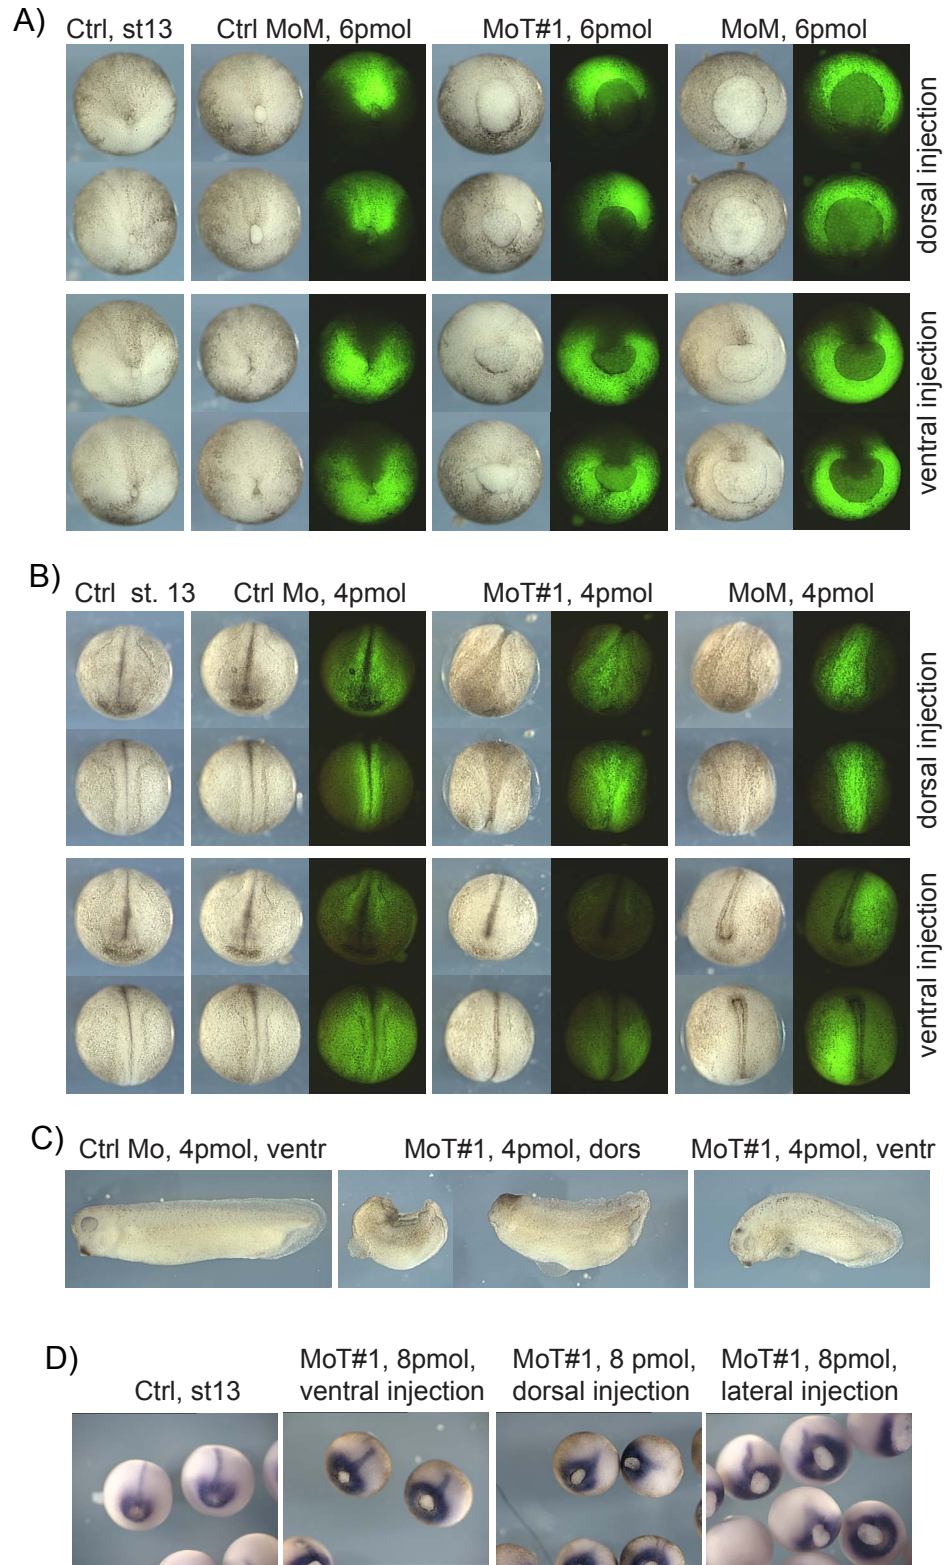

Figure S2
