# Supplementary material for: Agonistic and Antagonistic Roles for TNIK and MINK in Non-Canonical and Canonical Wnt Signalling
Source: PubMed Central journal article supplement (PMC3439448; doi:10.1371/journal.pone.0043330), 2012-09-11
Supplement: pone.0043330.s006.pdf [file pone.0043330.s006.pdf]

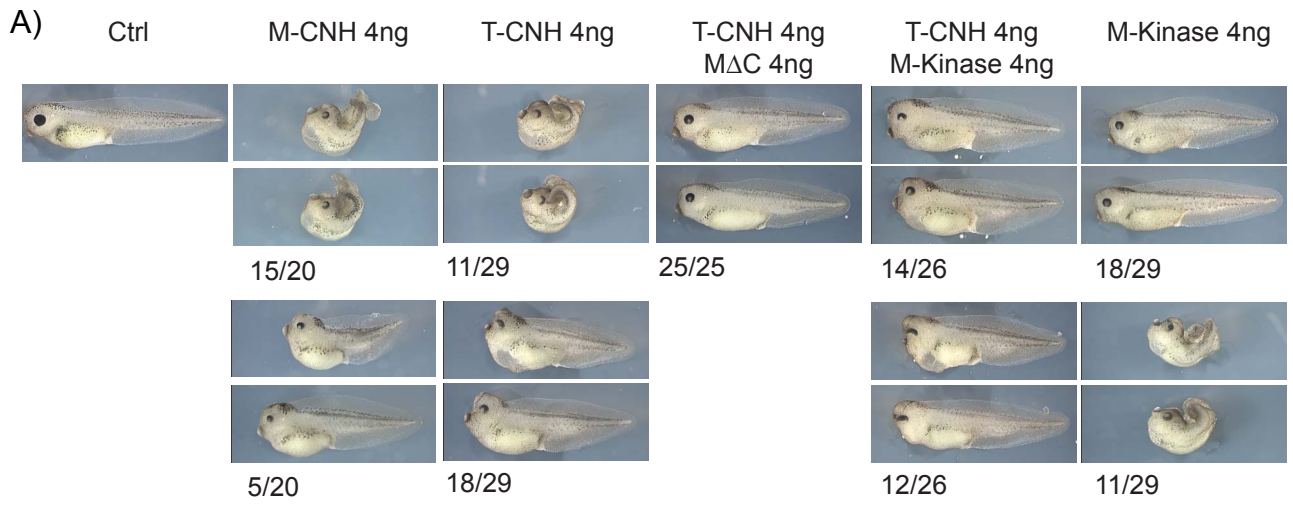

B)

| Injected constructs                 | I  | II | III | rescue |
|-------------------------------------|----|----|-----|--------|
| βCatenin (100pg)                    | 42 | 0  | 58  |        |
| βCatenin (100pg) + M-CNH (2ng)      | 7  | 41 | 52  | "+"    |
| βCatenin (100pg) + M-CNH (3.5ng)    | 0  | 22 | 78  | "++"   |
| βCatenin (100pg) + T-CNH (2.2ng)    | 12 | 44 | 44  | "+"    |
| βCatenin (100pg) + T-CNH (4.4ng)    | 7  | 33 | 60  | "+"    |
| βCatenin (100pg) + M-Kinase (1.3ng) | 0  | 0  | 100 | "+++"  |
| βCatenin (100pg) + T-Kinase (1.3ng) | X  | X  | X   | "DEAD" |
|                                     |    |    |     |        |
| βCatenin (150pg)                    | 39 | 43 | 18  |        |
| βCatenin (150pg) + M-CNH (3.5ng)    | 4  | 42 | 54  | "++"   |
| βCatenin (150pg) + T-CNH (4.4ng)    | 5  | 24 | 71  | "++"   |
| βCatenin (150pg) + T-CNH (2.2ng)    | 39 | 47 | 14  | "-"    |
| βCatenin (150pg) + M-Kinase (1.3ng) | 0  | 0  | 100 | "+++"  |
| βCatenin (150pg) + T-Kinase (1.3ng) | X  | X  | X   | "DEAD" |

Figure S7
